# Supplementary material
Source: PubMed Central journal article supplement (PMC11227118)
Supplement: NIHMS1985549-supplement-PMID_33386644_SFigure.pdf [file NIHMS1985549-supplement-PMID_33386644_SFigure.pdf]

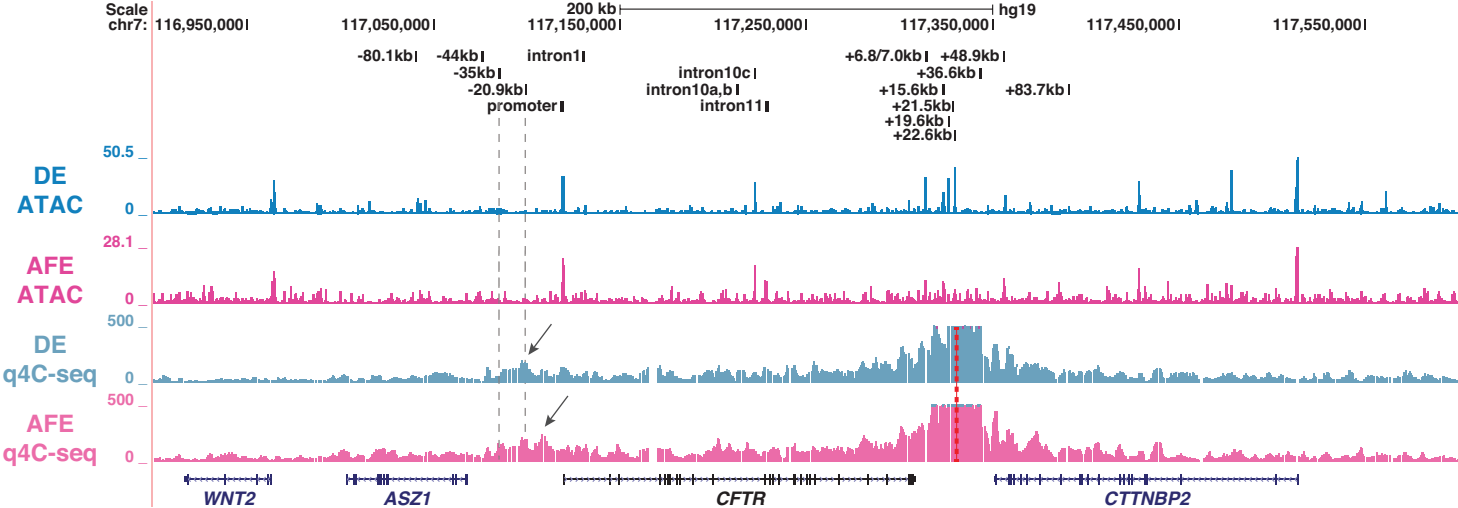

**Supplementary Figure 1. The +22.6kb CRE interacts with the *CFTR* locus in DE/AFE cells.** UCSC Genome Browser view of ATAC-seq IDR and quantitative 4C-seq tracks across the *CFTR* locus at DE and AFE in ND2.0 cells. Known *CFTR* CREs are shown at the top in black, together with novel developmental *CFTR* CREs. Red dotted line denotes the 4C-seq viewpoint region at +22.6kb, with grey dashed line and grey arrows showing interactions of +22.6kb with 5' CREs for the *CFTR* gene. Interactions are seen across the whole of the *CFTR* locus though not the length of the *CTTNBP2* locus.
